# Supplementary material for: Strecker degradation of amino acids promoted by a camphor-derived sulfonamide
Source: publisher site journal article supplement (doi:10.3762/bjoc.12.73), 2016-04-18
Supplement: Additional file 1 [file 1860-5397-12-73-S1.pdf]

**Supporting Information File 1**  
**for**  
**Strecker degradation of amino acids promoted by**  
**a camphor-derived sulfonamide**

M. Fernanda N. N. Carvalho<sup>1\*</sup>, M. João Ferreira<sup>1</sup>, Ana S. O. Knittel<sup>1</sup>, Maria da Conceição Oliveira<sup>1</sup>, João Costa Pessoa<sup>1</sup>, Rudolf Herrmann<sup>2</sup>, and Gabriele Wagner<sup>3</sup>

Address: <sup>1</sup>Centro de Química Estrutural, Instituto Superior Técnico, Universidade de Lisboa, Av. Rovisco Pais 1049-001 Lisboa, Portugal, <sup>2</sup>Institut für Physik, Universität Augsburg, Universitätsstr. 2, 86159 Augsburg, Germany and <sup>3</sup>University of Chester, Faculty of Science and Engineering, Department of Natural Sciences, Thornton Science Park, Pool Lane, Ince, Chester, CH2 4NU, UK

Email: Maria Fernanda N. N. Carvalho - fcarvalho@ist.utl.pt

\*Corresponding author

Experimental spectra for compound **2**: FTIR, NMR (<sup>1</sup>H, <sup>13</sup>C, DEPT, HMBC, HSQC, NOESY), ESIMS and the proposed fragmentation mechanism for **2** and **12**

## Experimental Data

(3a*S*,6*S*,*Z*)-7-(((3a*S*,6*S*)-8,8-Dimethyl-2,2-dioxido-4,5,6,7-tetrahydro-3*H*-3a,6-methanobenzo[*c*]isothiazol-7-yl)imino)-8,8-dimethyl-4,5,6,7-tetrahydro-3*H*-3a,6-methanobenzo[*c*]isothiazole 2,2-dioxide (**2**).

## Spectroscopic data

### FTIR

The spectrum was obtained from KBr pellets using a JASCO FT/IR 4100 spectrometer.

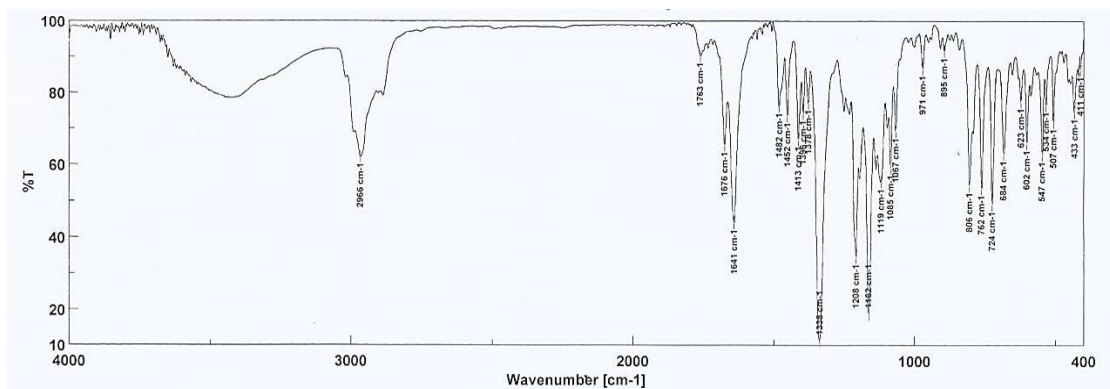

Figure S1: Spectrum of **2** (range 4000–400 cm<sup>-1</sup>)

### NMR

The spectra were obtained at 20 °C in CD<sub>3</sub>CN using a Bruker Avance II<sup>+</sup> 400 MHz spectrometer. The chemical shifts were referenced to TMS ( $\delta = 0$  ppm).

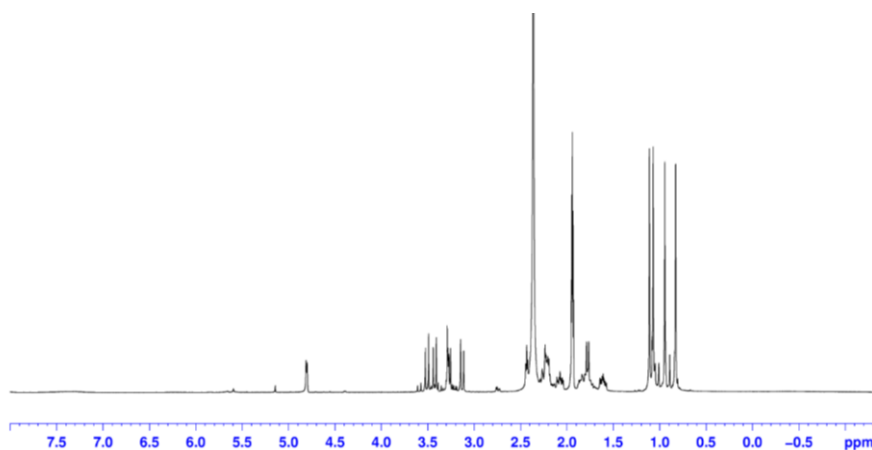

Figure S2: <sup>1</sup>H NMR spectrum of **2** obtained in CD<sub>3</sub>CN at -20 °C.

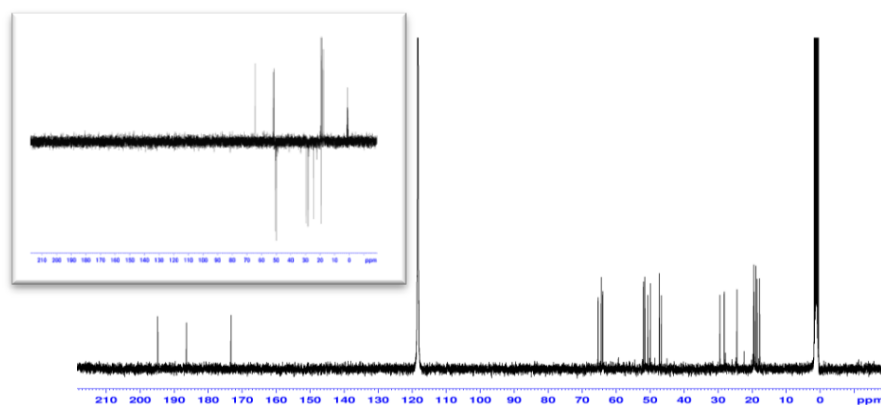

Figure S3:  $^{13}\text{C}$  NMR spectrum and DEPT (insert) of **2** obtained in  $\text{CD}_3\text{CN}$  at  $-20^\circ\text{C}$ .

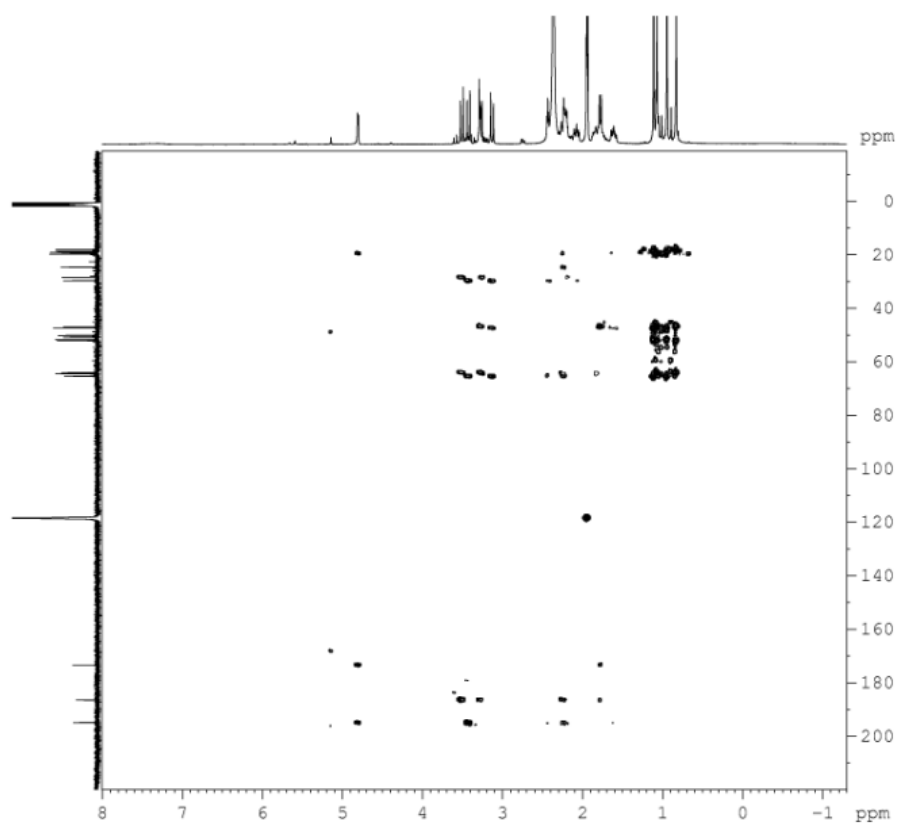

Figure S4: HMBC of **2** obtained in  $\text{CD}_3\text{CN}$  at  $-20^\circ\text{C}$ .

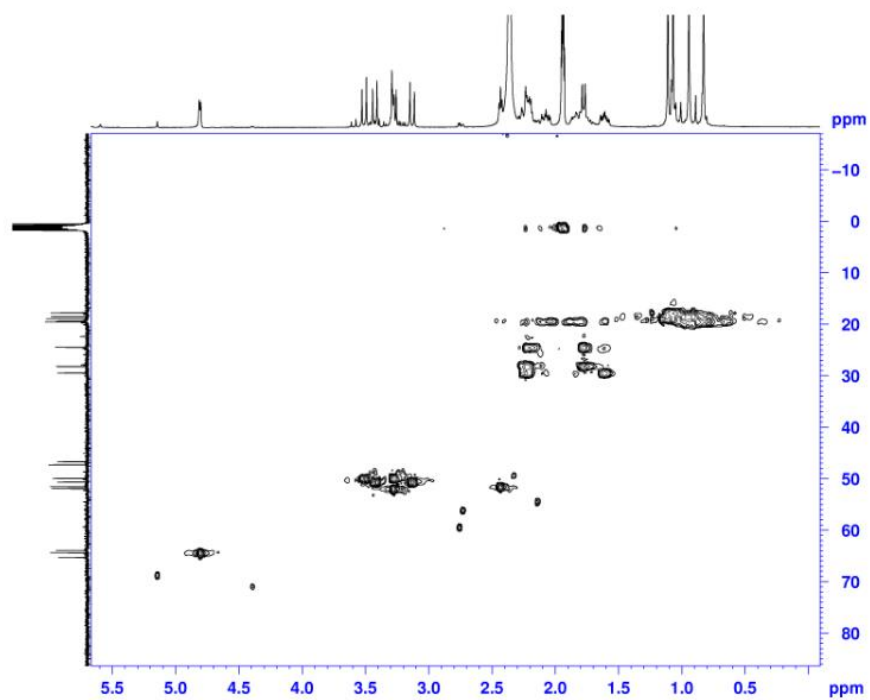

Figure S5: HSQC of **2** obtained in CD<sub>3</sub>CN at -20 °C.

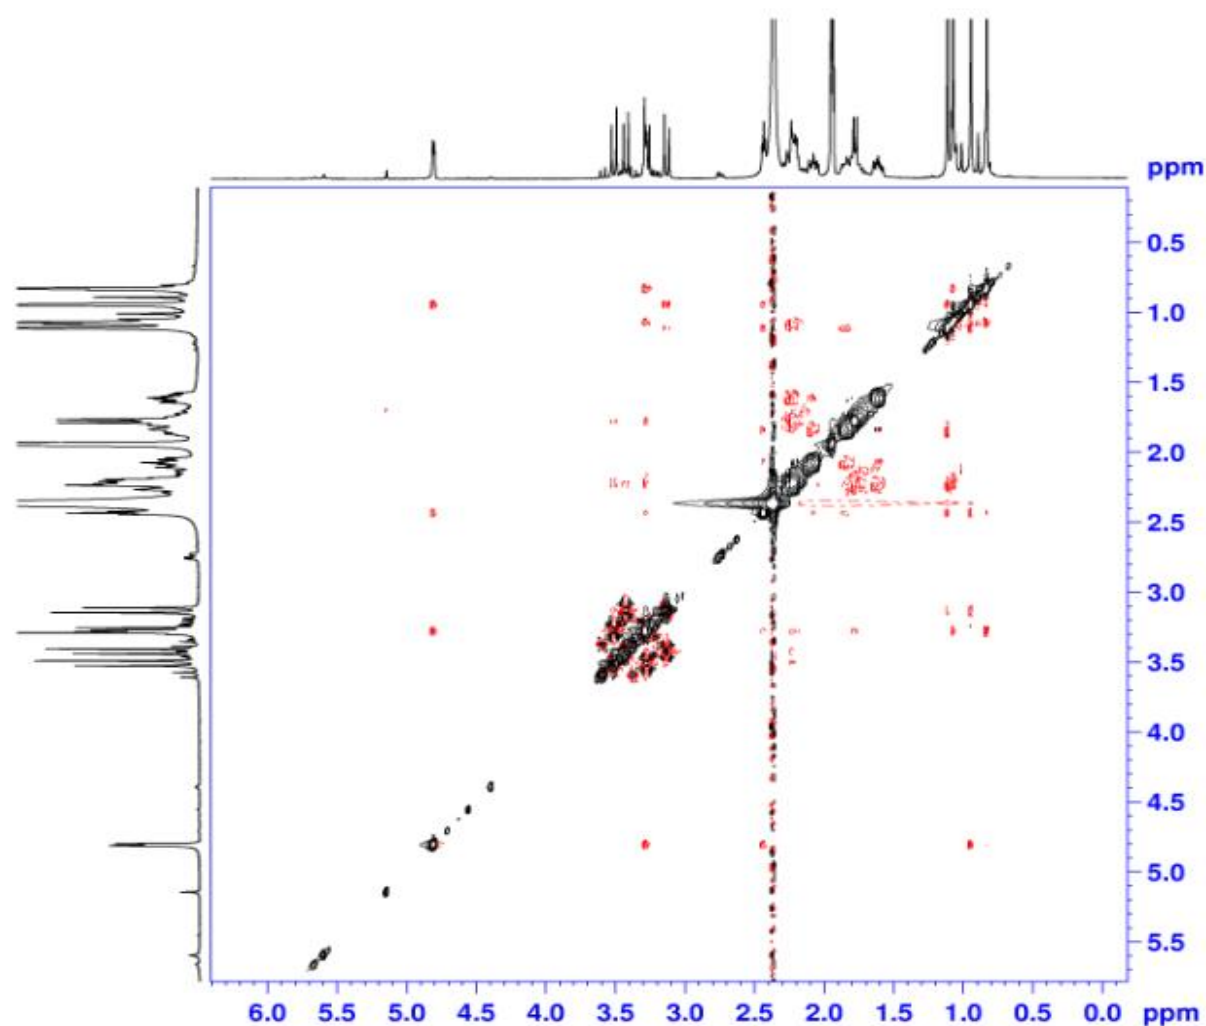

Figure S6: NOESY of **2** obtained in CD<sub>3</sub>CN at –20 °C.

## ESI-MS

### Data for **2**

LRESI mass spectrum and tandem mass experiments were carried out on a LCQ Fleet mass spectrometer operated in the ESI positive ion mode (Thermo Scientific), with the following optimized parameters: ion spray voltage, +4.5 kV; capillary voltage, 16 V; tube lens offset, –63 V; sheath gas (N<sub>2</sub>), 80 arbitrary units; auxiliary gas, 5 arbitrary units; capillary temperature, 250 °C. The spectra were recorded in the range 100–1500 Da. Spectrum typically corresponds to the average of 20–35 scans. Tandem mass spectrum was obtained with an isolation window of 2 Da, a 30% relative collision energy and with an activation energy of 30 ms. HRESI mass spectrum was obtained on a UHR-QqTOF Impact II (Bruker Daltonics) operating in the high resolution mode.

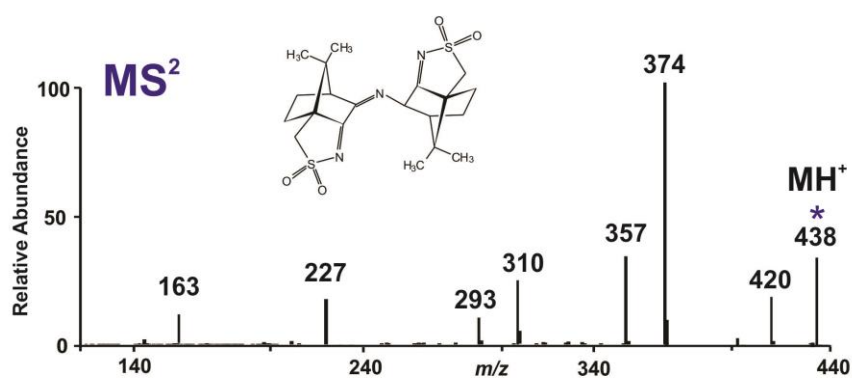

Figure S7: ESI tandem mass spectrum of the protonated molecule of **2**.

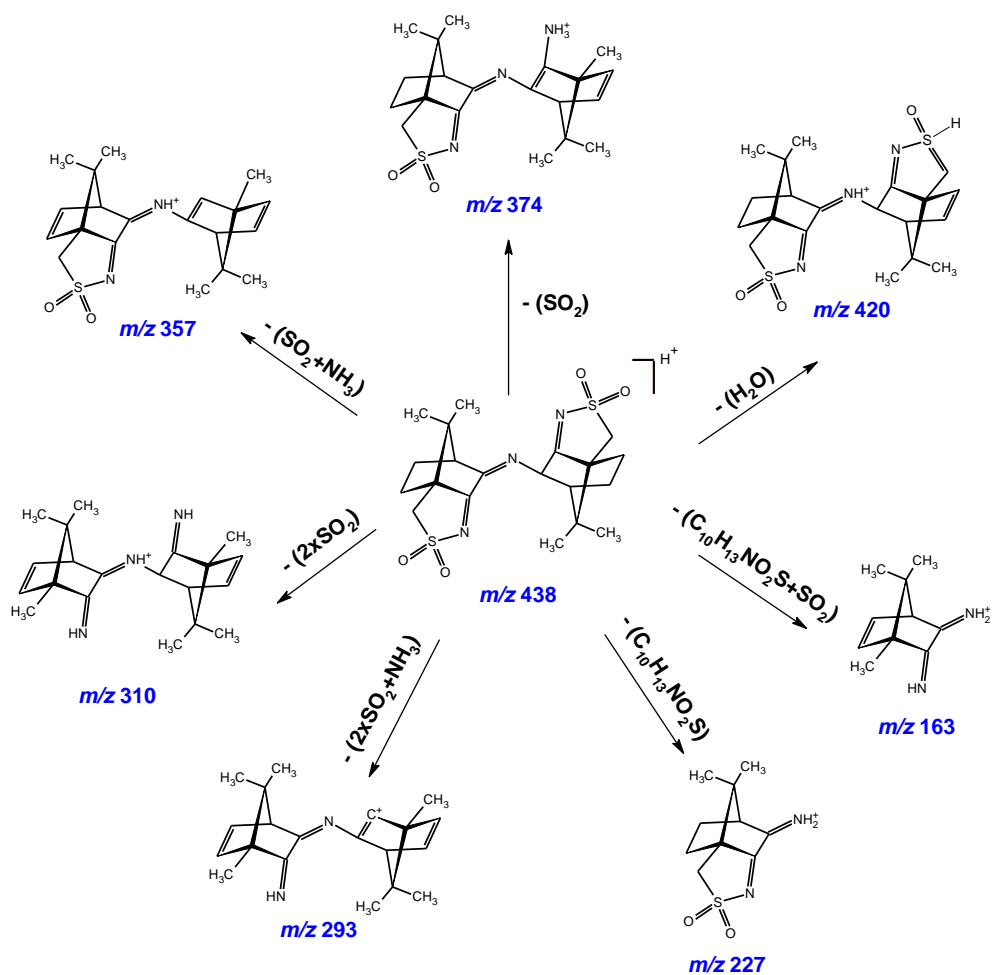

Figure S8: Proposed fragmentation mechanism for the precursor ion *m/z* 438.

Data for **12**

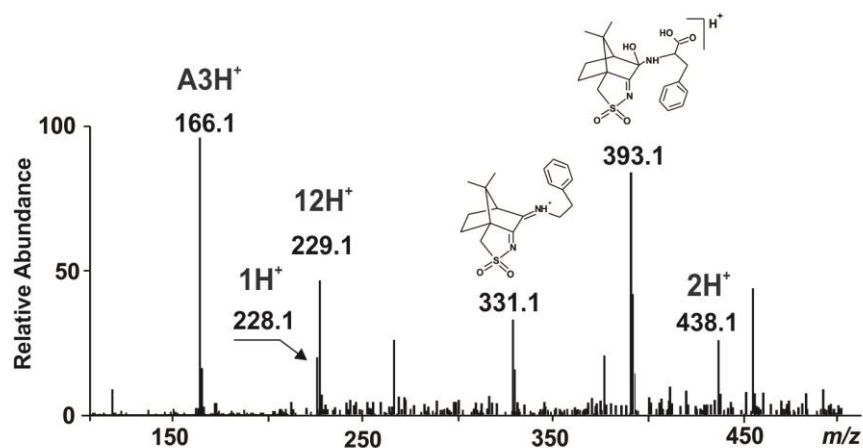

Figure S9: ESI tandem mass spectrum of the reaction mixture after 1 h reaction showing protonated phenylalanine, **A3**; oxoimine, **1**; the proposed intermediate **12** (Figure 11 in the manuscript) and the final product **2**. Other intermediates were identified and their formula assigned to the corresponding mass.

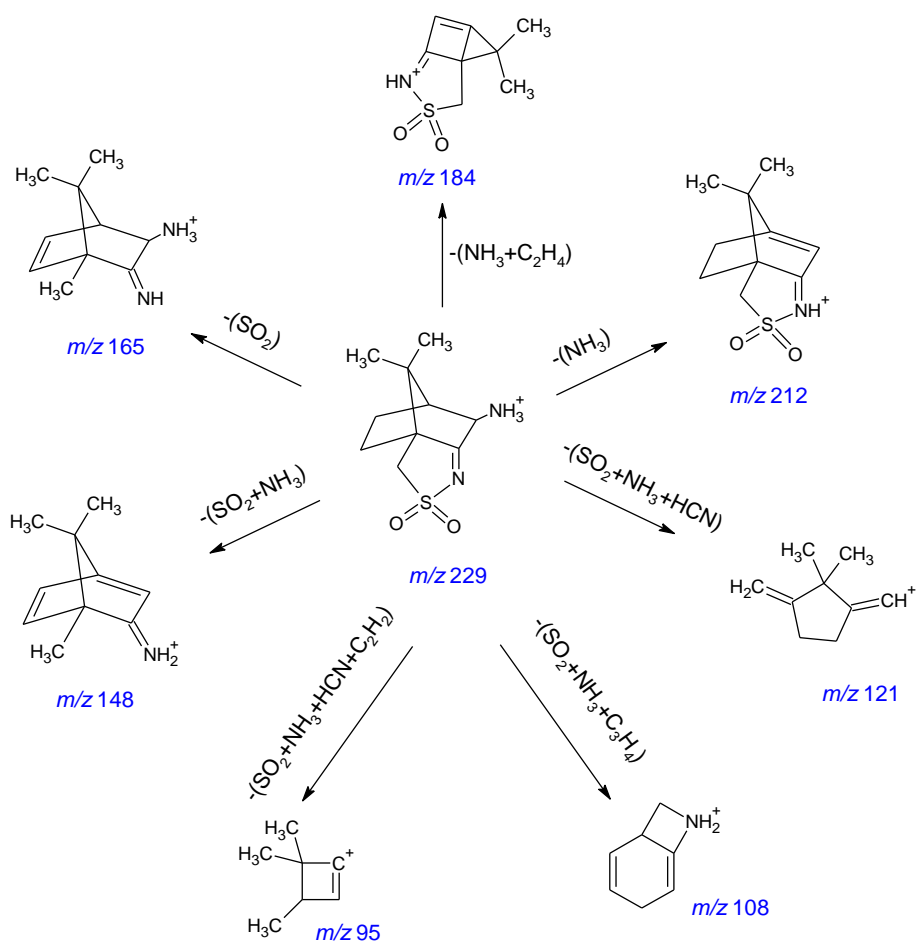

Figure S10: Proposed fragmentation mechanism for intermediate **12** ( $m/z$  229).
